# Supplementary material
Source: PubMed Central journal article supplement (PMC3982868)

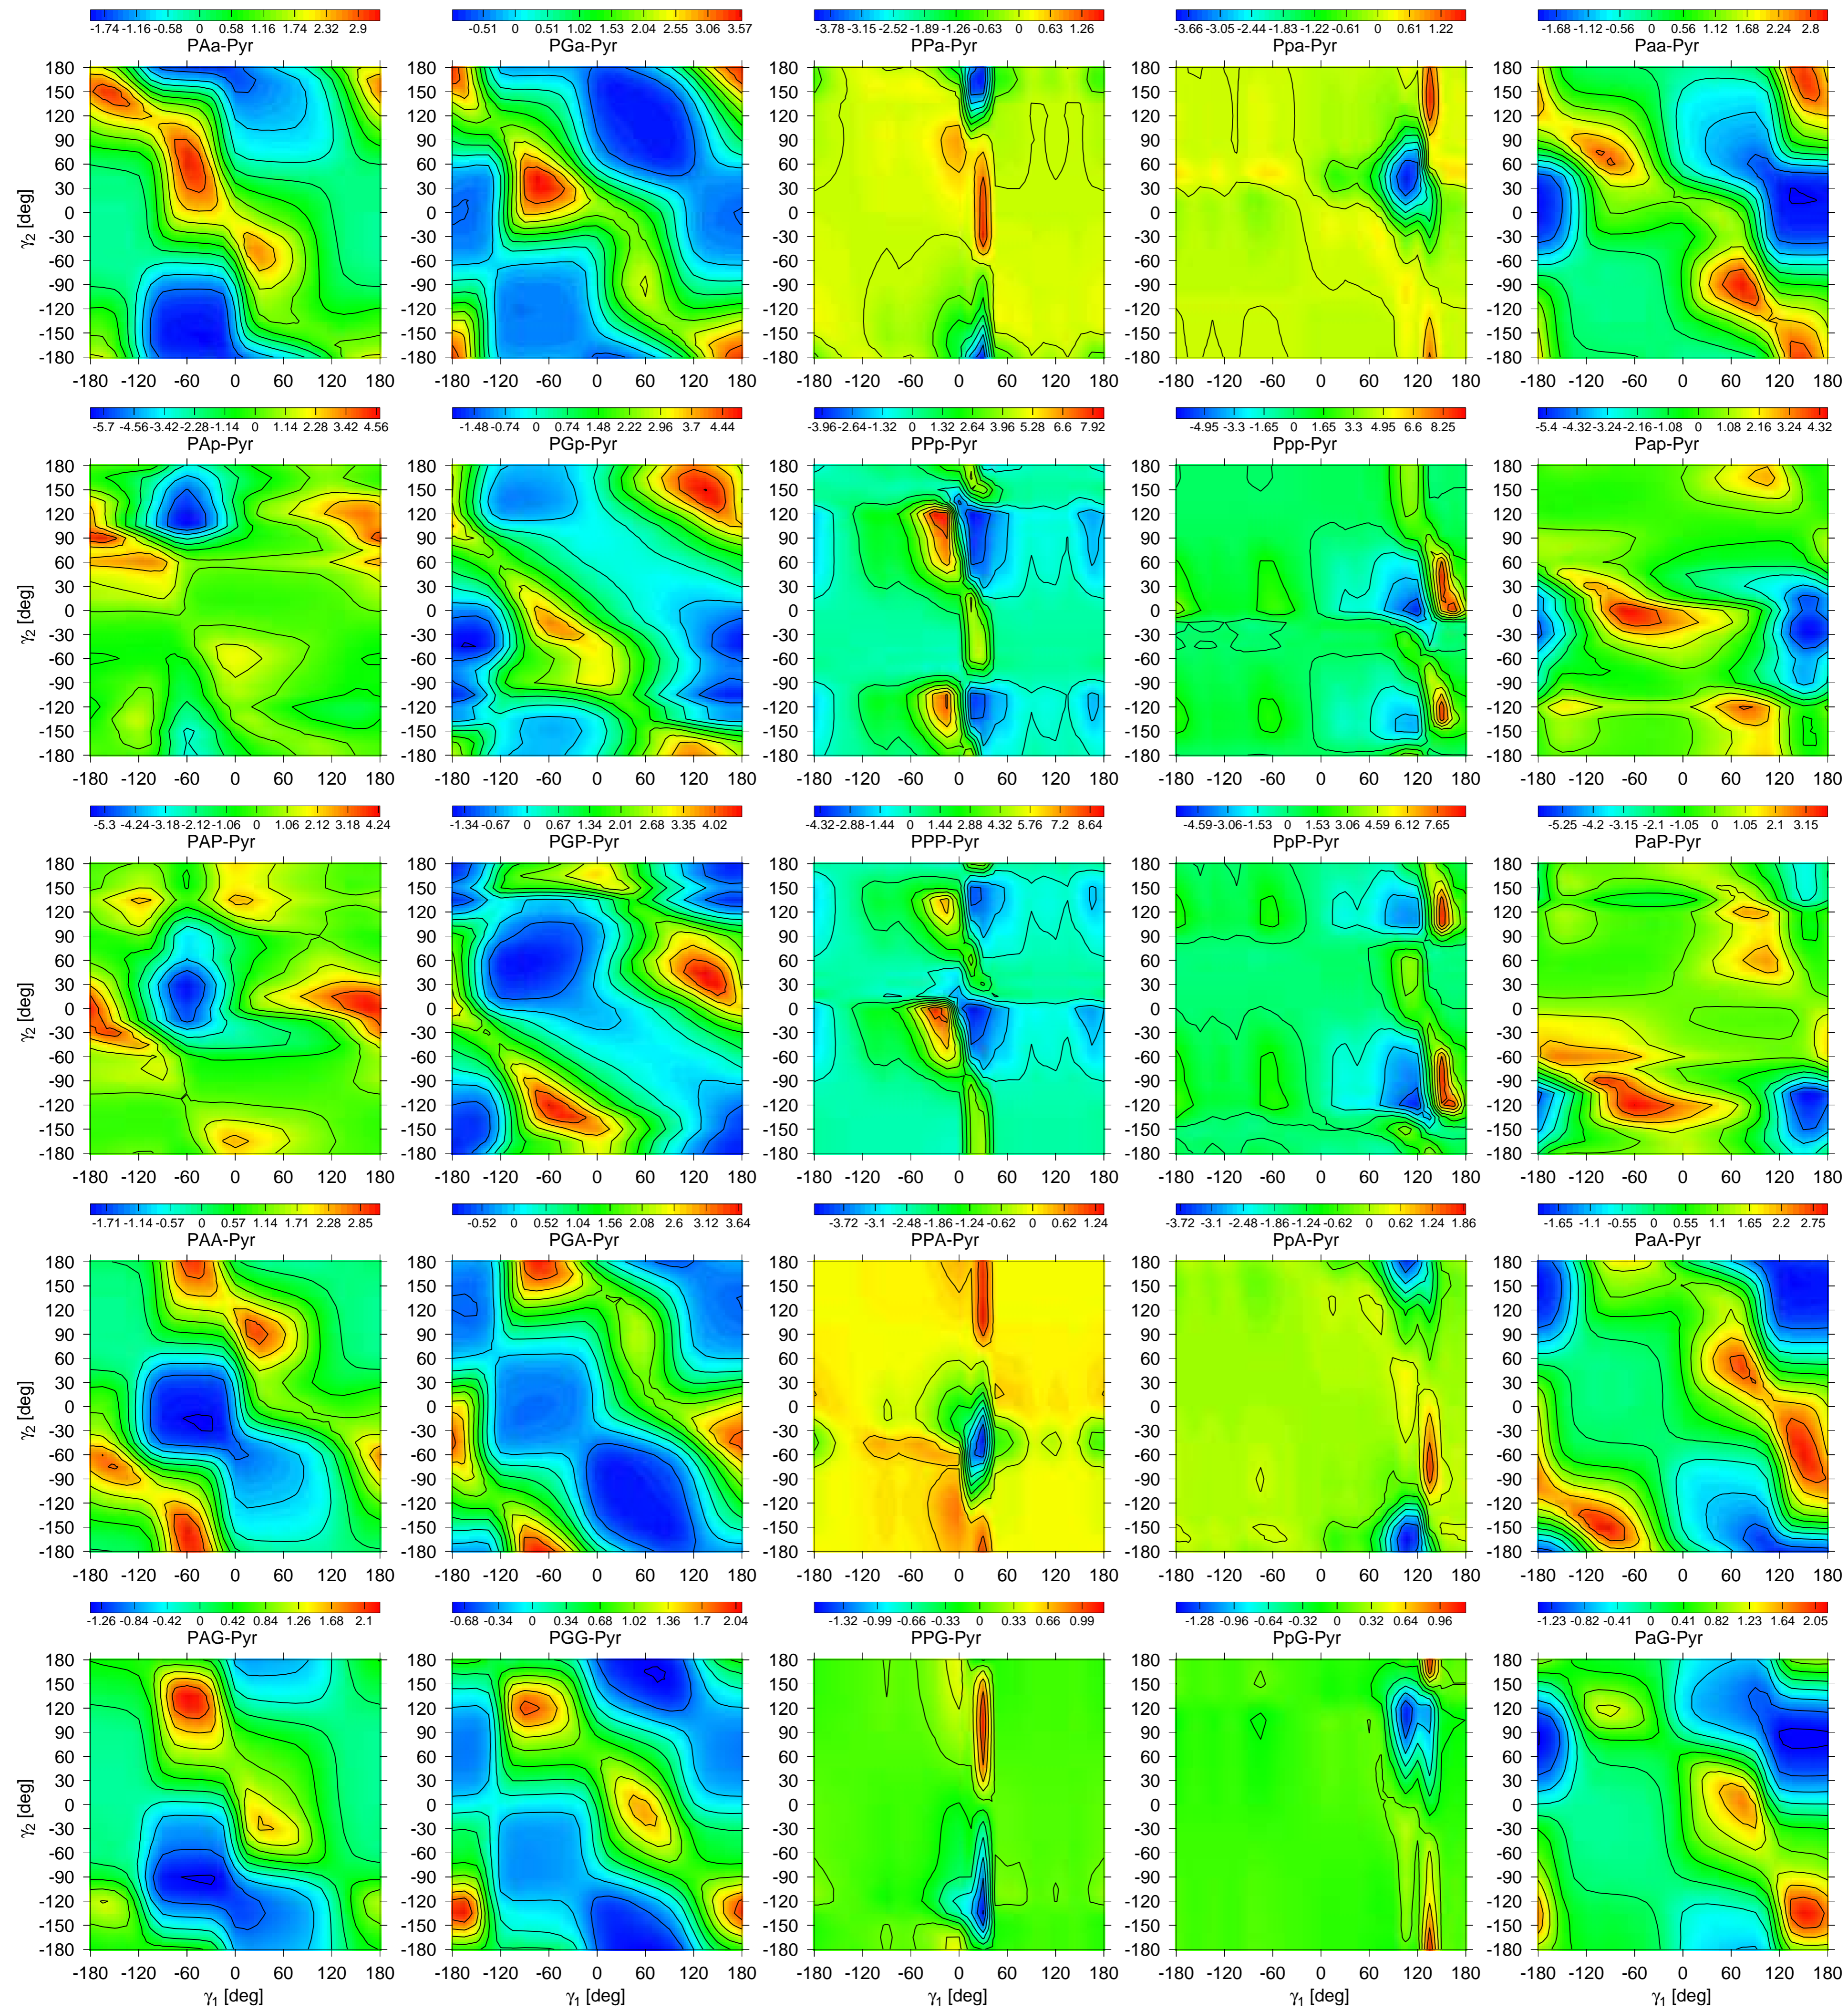

Figure S1-4

Supplement: NIHMS457585-supplement-FigS1-4.pdf [file NIHMS457585-supplement-FigS1-4.pdf]
